# Supplementary material for: iChip-Inspired Isolation, Bioactivities and Dereplication of Actinomycetota from Portuguese Beach Sediments
Source: MDPI journal article supplement (doi:10.3390/microorganisms10071471), 2022-07-20
Supplement: s1 [file s1]

**Table S1** - Isolated strains ID, affiliation, phyla and 16S rRNA gene GenBank accession number.

| Strain ID    | Affiliation (according to EzBioCloud) |                                                | Phylum         | GenBank<br>16S rRNA<br>gene<br>Accession<br>Number |
|--------------|---------------------------------------|------------------------------------------------|----------------|----------------------------------------------------|
|              | %                                     | Taxonomic unit                                 |                |                                                    |
| PMIC_1E12B   | 100.00                                | <i>Arthrobacter gandavensis</i> R 5812         | Actinomycetota | MW740015                                           |
| PMIC_1F10B.1 | 100.00                                | <i>Arthrobacter gandavensis</i> R 5812         | Actinomycetota | MW740020                                           |
| PMIC_1F10C.1 | 100.00                                | <i>Arthrobacter gandavensis</i> R 5812         | Actinomycetota | MW740021                                           |
| PMIC_2F9     | 100.00                                | <i>Arthrobacter gandavensis</i> R 5812         | Actinomycetota | MW740074                                           |
| PMIC_1D8B    | 100.00                                | <i>Corynebacterium marinum</i> DSM 44953       | Actinomycetota | MW740010                                           |
| PMIC_1C11A   | 100.00                                | <i>Dietzia maris</i> DSM 43672                 | Actinomycetota | MW740000                                           |
| PMIC_1C5B.1  | 100.00                                | <i>Dietzia maris</i> DSM 43672                 | Actinomycetota | MW740004                                           |
| PMIC_1H7A    | 100.00                                | <i>Kocuria polaris</i> CMS 76or                | Actinomycetota | MW740027                                           |
| PMIC_1C1B    | 98.48                                 | <i>Microbacterium diaminobutyricum</i> RZ63    | Actinomycetota | MW740003                                           |
| PMIC_1A10A   | 100.00                                | <i>Microbacterium flavum</i> YM18-098          | Actinomycetota | MW739985                                           |
| PMIC_1C7A    | 99.92                                 | <i>Microbacterium phyllosphaerae</i> DSM 13468 | Actinomycetota | MW740005                                           |
| PMIC_1E12A   | 99.44                                 | <i>Micromonospora citrea</i> DSM 43903         | Actinomycetota | MW740014                                           |
| PMIC_1A10B   | 99.82                                 | <i>Nocardia nova</i> NBRC 15556                | Actinomycetota | MW739986                                           |
| PMIC_1A11B.1 | 99.92                                 | <i>Nocardiopsis alba</i> DSM 43377             | Actinomycetota | MW739987                                           |
| PMIC_1A11B.2 | 100.00                                | <i>Nocardiopsis alba</i> DSM 43377             | Actinomycetota | MW739988                                           |
| PMIC_1F6A.1  | 99.77                                 | <i>Nocardiopsis alba</i> DSM 43377             | Actinomycetota | MW740024                                           |
| PMIC_1F6A.2  | 99.76                                 | <i>Nocardiopsis alba</i> DSM 43377             | Actinomycetota | MW740025                                           |
| PMIC_1F6A3   | 99.76                                 | <i>Nocardiopsis alba</i> DSM 43377             | Actinomycetota | MW740026                                           |
| PMIC_2A11A.1 | 99.92                                 | <i>Nocardiopsis alba</i> DSM 43377             | Actinomycetota | MW740030                                           |
| PMIC_2A11A.2 | 100.00                                | <i>Nocardiopsis alba</i> DSM 43377             | Actinomycetota | MW740031                                           |
| PMIC_2A11B.1 | 100.00                                | <i>Nocardiopsis alba</i> DSM 43377             | Actinomycetota | MW740032                                           |
| PMIC_2A11B.2 | 100.00                                | <i>Nocardiopsis alba</i> DSM 43377             | Actinomycetota | MW740033                                           |
| PMIC_2A11B.3 | 100.00                                | <i>Nocardiopsis alba</i> DSM 43377             | Actinomycetota | MW740034                                           |
| PMIC_2F6A    | 99.76                                 | <i>Nocardiopsis alba</i> DSM 43377             | Actinomycetota | MW740071                                           |
| PMIC_2F6B    | 99.76                                 | <i>Nocardiopsis alba</i> DSM 43377             | Actinomycetota | MW740072                                           |
| PMIC_2F6C    | 99.77                                 | <i>Nocardiopsis alba</i> DSM 43377             | Actinomycetota | MW740073                                           |
| PMIC_2H2A    | 100.00                                | <i>Nocardiopsis alba</i> DSM 43377             | Actinomycetota | MW740077                                           |
| PMIC_2H2C.1  | 100.00                                | <i>Nocardiopsis alba</i> DSM 43377             | Actinomycetota | MW740078                                           |
| PMIC_2H2C.2  | 100.00                                | <i>Nocardiopsis alba</i> DSM 43377             | Actinomycetota | MW740079                                           |
| PMIC_1D11B   | 99.84                                 | <i>Nocardiopsis prasina</i> DSM 43845          | Actinomycetota | MW740009                                           |
| PMIC_2B1A    | 99.85                                 | <i>Nocardiopsis prasina</i> DSM 43845          | Actinomycetota | MW740039                                           |
| PMIC_2B1C    | 99.82                                 | <i>Nocardiopsis prasina</i> DSM 43845          | Actinomycetota | MW740040                                           |
| PMIC_2B1D    | 99.85                                 | <i>Nocardiopsis prasina</i> DSM 43845          | Actinomycetota | MW740041                                           |
| PMIC_2D10A   | 99.84                                 | <i>Nocardiopsis prasina</i> DSM 43845          | Actinomycetota | MW740052                                           |
| PMIC_2D10B.1 | 99.75                                 | <i>Nocardiopsis prasina</i> DSM 43845          | Actinomycetota | MW740053                                           |
| PMIC_2D10B.2 | 99.84                                 | <i>Nocardiopsis prasina</i> DSM 43845          | Actinomycetota | MW740054                                           |
| PMIC_2D10C   | 99.84                                 | <i>Nocardiopsis prasina</i> DSM 43845          | Actinomycetota | MW740055                                           |
| PMIC_2F12A   | 99.82                                 | <i>Nocardiopsis prasina</i> DSM 43845          | Actinomycetota | MW740068                                           |
| PMIC_2C3B.1  | 99.11                                 | <i>Nocardiopsis umidischolae</i> 66/93         | Actinomycetota | MW740045                                           |

|              |        |                                               |                       |          |
|--------------|--------|-----------------------------------------------|-----------------------|----------|
| PMIC_2C3B.2  | 99.11  | <i>Nocardiosis umidischolae</i> 66/93         | <i>Actinomycetota</i> | MW740046 |
| PMIC_2C3B.3  | 99.19  | <i>Nocardiosis umidischolae</i> 66/93         | <i>Actinomycetota</i> | MW740047 |
| PMIC_2C3B.4  | 99.20  | <i>Nocardiosis umidischolae</i> 66/93         | <i>Actinomycetota</i> | MW740048 |
| PMIC_2H6     | 99.81  | <i>Plantibacter flavus</i> VKM Ac-2504        | <i>Actinomycetota</i> | MW740080 |
| PMIC_1E10C   | 99.69  | <i>Rhodococcus coprophilus</i> NBRC 100603    | <i>Actinomycetota</i> | MW740013 |
| PMIC_2E10    | 99.69  | <i>Rhodococcus coprophilus</i> NBRC 100603    | <i>Actinomycetota</i> | MW740062 |
| PMIC_1E9B    | 100.00 | <i>Rhodococcus erythropolis</i> NBRC 15567    | <i>Actinomycetota</i> | MW740017 |
| PMIC_2E9B.1  | 100.00 | <i>Rhodococcus erythropolis</i> NBRC 15567    | <i>Actinomycetota</i> | MW740066 |
| PMIC_2E9C    | 99.76  | <i>Rhodococcus qingshengii</i> JCM 15477      | <i>Actinomycetota</i> | MW740067 |
| PMIC_2A12A.1 | 99.68  | <i>Streptomyces albidoflavus</i> DSM 40455    | <i>Actinomycetota</i> | MW740035 |
| PMIC_2A12A.2 | 99.69  | <i>Streptomyces albidoflavus</i> DSM 40455    | <i>Actinomycetota</i> | MW740036 |
| PMIC_2A12B.1 | 99.77  | <i>Streptomyces albidoflavus</i> DSM 40455    | <i>Actinomycetota</i> | MW740037 |
| PMIC_2A12B.2 | 99.76  | <i>Streptomyces albidoflavus</i> DSM 40455    | <i>Actinomycetota</i> | MW740038 |
| PMIC_2C12    | 99.69  | <i>Streptomyces albidoflavus</i> DSM 40455    | <i>Actinomycetota</i> | MW740042 |
| PMIC_1A3B.1  | 100.00 | <i>Streptomyces albogriseolus</i> NRRL B-1305 | <i>Actinomycetota</i> | MW739992 |
| PMIC_1A3B.2  | 100.00 | <i>Streptomyces albogriseolus</i> NRRL B-1305 | <i>Actinomycetota</i> | MW739993 |
| PMIC_1A3C    | 100.00 | <i>Streptomyces albogriseolus</i> NRRL B-1305 | <i>Actinomycetota</i> | MW739994 |
| PMIC_1A8C    | 99.66  | <i>Streptomyces albogriseolus</i> NRRL B-1305 | <i>Actinomycetota</i> | MW739996 |
| PMIC_1C12A   | 99.67  | <i>Streptomyces albogriseolus</i> NRRL B-1305 | <i>Actinomycetota</i> | MW740001 |
| PMIC_1C12B   | 99.68  | <i>Streptomyces albogriseolus</i> NRRL B-1305 | <i>Actinomycetota</i> | MW740002 |
| PMIC_2G2A    | 99.68  | <i>Streptomyces ambofaciens</i> ATCC 23877    | <i>Actinomycetota</i> | MW740075 |
| PMIC_2G8C    | 99.68  | <i>Streptomyces ambofaciens</i> ATCC 23877    | <i>Actinomycetota</i> | MW740076 |
| PMIC_1C8A    | 99.69  | <i>Streptomyces ardesiacus</i> NRRL B-1773    | <i>Actinomycetota</i> | MW740006 |
| PMIC_2C8A    | 99.69  | <i>Streptomyces ardesiacus</i> NRRL B-1773    | <i>Actinomycetota</i> | MW740049 |
| PMIC_2C8B    | 99.70  | <i>Streptomyces ardesiacus</i> NRRL B-1773    | <i>Actinomycetota</i> | MW740050 |
| PMIC_2D8A    | 100.00 | <i>Streptomyces ardesiacus</i> NRRL B-1773    | <i>Actinomycetota</i> | MW740060 |
| PMIC_2D8B    | 100.00 | <i>Streptomyces ardesiacus</i> NRRL B-1773    | <i>Actinomycetota</i> | MW740061 |
| PMIC_1A8B    | 99.43  | <i>Streptomyces flavoviridis</i> NBRC 12772   | <i>Actinomycetota</i> | MW739995 |
| PMIC_1D9A    | 99.80  | <i>Streptomyces griseoflavus</i> LMG 19344    | <i>Actinomycetota</i> | MW740011 |
| PMIC_1D9B    | 99.75  | <i>Streptomyces griseoflavus</i> LMG 19344    | <i>Actinomycetota</i> | MW740012 |
| PMIC_1D11A.1 | 99.85  | <i>Streptomyces hydrogenans</i> NBRC 13475    | <i>Actinomycetota</i> | MW740007 |
| PMIC_1D11A.2 | 99.84  | <i>Streptomyces hydrogenans</i> NBRC 13475    | <i>Actinomycetota</i> | MW740008 |
| PMIC_1I1A    | 100.00 | <i>Streptomyces hydrogenans</i> NBRC 13475    | <i>Actinomycetota</i> | MW740028 |
| PMIC_1I1B    | 100.00 | <i>Streptomyces hydrogenans</i> NBRC 13475    | <i>Actinomycetota</i> | MW740029 |
| PMIC_2C8C    | 99.57  | <i>Streptomyces hydrogenans</i> NBRC 13475    | <i>Actinomycetota</i> | MW740051 |
| PMIC_2D11A.1 | 99.77  | <i>Streptomyces hydrogenans</i> NBRC 13475    | <i>Actinomycetota</i> | MW740056 |
| PMIC_2D11A.2 | 99.69  | <i>Streptomyces hydrogenans</i> NBRC 13475    | <i>Actinomycetota</i> | MW740057 |
| PMIC_2D11B   | 99.84  | <i>Streptomyces hydrogenans</i> NBRC 13475    | <i>Actinomycetota</i> | MW740058 |
| PMIC_2D11C   | 99.70  | <i>Streptomyces hydrogenans</i> NBRC 13475    | <i>Actinomycetota</i> | MW740059 |
| PMIC_1F12A   | 100.00 | <i>Streptomyces setonii</i> NRRL ISP-5322     | <i>Actinomycetota</i> | MW740022 |
| PMIC_1F12B   | 100.00 | <i>Streptomyces setonii</i> NRRL ISP-5322     | <i>Actinomycetota</i> | MW740023 |
| PMIC_2F12B   | 100.00 | <i>Streptomyces setonii</i> NRRL ISP-5322     | <i>Actinomycetota</i> | MW740069 |
| PMIC_2F12C   | 100.00 | <i>Streptomyces setonii</i> NRRL ISP-5322     | <i>Actinomycetota</i> | MW740070 |
| PMIC_1A3A.1  | 99.85  | <i>Streptomyces xiamenensis</i> MCCC 1A01550  | <i>Actinomycetota</i> | MW739989 |
| PMIC_1A3A.2  | 99.82  | <i>Streptomyces xiamenensis</i> MCCC 1A01550  | <i>Actinomycetota</i> | MW739990 |
| PMIC_1A3A.3  | 99.82  | <i>Streptomyces xiamenensis</i> MCCC 1A01550  | <i>Actinomycetota</i> | MW739991 |
| PMIC_1B3A.1  | 99.52  | <i>Streptomyces xiamenensis</i> MCCC 1A01550  | <i>Actinomycetota</i> | MW739997 |
| PMIC_1B3A.2  | 99.54  | <i>Streptomyces xiamenensis</i> MCCC 1A01550  | <i>Actinomycetota</i> | MW739998 |

|              |        |                                               |                       |          |
|--------------|--------|-----------------------------------------------|-----------------------|----------|
| PMIC_1B3A.3  | 99.55  | <i>Streptomyces xiamenensis</i> MCCC 1A01550  | <i>Actinomycetota</i> | MW739999 |
| PMIC_2C2A    | 99.84  | <i>Streptomyces xiamenensis</i> MCCC 1A01550  | <i>Actinomycetota</i> | MW740043 |
| PMIC_2C2B    | 99.81  | <i>Streptomyces xiamenensis</i> MCCC 1A01550  | <i>Actinomycetota</i> | MW740044 |
| PMIC_2E9A.1  | 99.84  | <i>Streptomyces xiamenensis</i> MCCC 1A01550  | <i>Actinomycetota</i> | MW740063 |
| PMIC_2E9A.2  | 99.85  | <i>Streptomyces xiamenensis</i> MCCC 1A01550  | <i>Actinomycetota</i> | MW740064 |
| PMIC_2E9A.3  | 99.85  | <i>Streptomyces xiamenensis</i> MCCC 1A01550  | <i>Actinomycetota</i> | MW740065 |
| PMIC_1E9A    | 99.82  | <i>Streptomyces xiamenensis</i> MCCC1A01550   | <i>Actinomycetota</i> | MW740016 |
| PMIC_1E9C    | 99.84  | <i>Streptomyces xiamenensis</i> MCCC1A01550   | <i>Actinomycetota</i> | MW740018 |
| PMIC_1E9D    | 99.81  | <i>Streptomyces xiamenensis</i> MCCC1A01550   | <i>Actinomycetota</i> | MW740019 |
| PMIC_1E1A.1  | 99.52  | <i>Aquimarina algiphila</i> 9Alg 151          | <i>Bacteroidota</i>   | MW740084 |
| PMIC_1E1A.2  | 99.91  | <i>Aquimarina amphilecti</i> 92V              | <i>Bacteroidota</i>   | MW740085 |
| PMIC_1A1     | 99.06  | <i>Aquimarina muelleri</i> KMM 6020           | <i>Bacteroidota</i>   | MW740081 |
| PMIC_1E11B.2 | 99.59  | <i>Arenibacter aquaticus</i> GUO666           | <i>Bacteroidota</i>   | MW740083 |
| PMIC_2G2B    | 99.74  | <i>Arenibacter aquaticus</i> GUO666           | <i>Bacteroidota</i>   | MW740087 |
| PMIC_1B2     | 99.92  | <i>Catalinimonas alkaloidigena</i> CNU-914    | <i>Bacteroidota</i>   | MW740082 |
| PMIC_2E5A    | 99.67  | <i>Tenacibaculum gallaicum</i> A37.1          | <i>Bacteroidota</i>   | MW740086 |
| PMIC_2C11    | 100.00 | <i>Alkalihalobacillus algicola</i> KMM 3737   | <i>Bacillus</i>       | MW740107 |
| PMIC_2G8A.1  | 100.00 | <i>Alkalihalobacillus hwajinpoensis</i> SW-72 | <i>Bacillus</i>       | MW740108 |
| PMIC_1B9B.1  | 100.00 | <i>Bacillus aryabhatai</i> B8W22              | <i>Bacillus</i>       | MW740089 |
| PMIC_1B9B.2  | 100.00 | <i>Bacillus aryabhatai</i> B8W22              | <i>Bacillus</i>       | MW740090 |
| PMIC_1E11A.1 | 100.00 | <i>Bacillus aryabhatai</i> B8W22              | <i>Bacillus</i>       | MW740093 |
| PMIC_1E11B.1 | 100.00 | <i>Bacillus aryabhatai</i> B8W22              | <i>Bacillus</i>       | MW740094 |
| PMIC_1E1B.1  | 100.00 | <i>Bacillus aryabhatai</i> B8W22              | <i>Bacillus</i>       | MW740095 |
| PMIC_1E1B.2  | 100.00 | <i>Bacillus aryabhatai</i> B8W22              | <i>Bacillus</i>       | MW740096 |
| PMIC_2A10B.3 | 100.00 | <i>Bacillus aryabhatai</i> B8W22              | <i>Bacillus</i>       | MW740102 |
| PMIC_2B9A.1  | 100.00 | <i>Bacillus horikoshii</i> DSM 8719           | <i>Bacillus</i>       | MW740104 |
| PMIC_2B9A.2  | 100.00 | <i>Bacillus horikoshii</i> DSM 8719           | <i>Bacillus</i>       | MW740105 |
| PMIC_2B9A.3  | 100.00 | <i>Bacillus horikoshii</i> DSM 8719           | <i>Bacillus</i>       | MW740106 |
| PMIC_1E10A   | 99.71  | <i>Bacillus licheniformis</i> ATCC 14580      | <i>Bacillus</i>       | MW740092 |
| PMIC_1F10B.2 | 99.93  | <i>Bacillus megaterium</i> NBRC 15308         | <i>Bacillus</i>       | MW740097 |
| PMIC_1F10B.3 | 99.92  | <i>Bacillus megaterium</i> NBRC 15308         | <i>Bacillus</i>       | MW740098 |
| PMIC_1F10C.2 | 99.92  | <i>Bacillus megaterium</i> NBRC 15308         | <i>Bacillus</i>       | MW740099 |
| PMIC_2A10B.1 | 100.00 | <i>Bacillus megaterium</i> NBRC 15308         | <i>Bacillus</i>       | MW740101 |
| PMIC_1A11C   | 100.00 | <i>Bacillus mycoides</i> DSM 2048             | <i>Bacillus</i>       | MW740088 |
| PMIC_2A11C   | 100.00 | <i>Bacillus mycoides</i> DSM 2048             | <i>Bacillus</i>       | MW740103 |
| PMIC_2H10A   | 99.92  | <i>Bacillus pumilus</i> ATCC 7061             | <i>Bacillus</i>       | MW740109 |
| PMIC_1D12    | 100.00 | <i>Bacillus toyonensis</i> BCT-7112           | <i>Bacillus</i>       | MW740091 |
| PMIC_2A10A   | 99.85  | <i>Fictibacillus phosphorivorans</i> Ca7      | <i>Bacillus</i>       | MW740100 |
| PMIC_2H3     | 100.00 | <i>Cobetia amphilecti</i> KMM 1561            | <i>Pseudomonadota</i> | MW740140 |
| PMIC_1D2B.1  | 99.85  | <i>Cobetia marina</i> JCM 21022               | <i>Pseudomonadota</i> | MW740118 |
| PMIC_1D2B.3  | 100.00 | <i>Cobetia marina</i> JCM 21022               | <i>Pseudomonadota</i> | MW740120 |
| PMIC_2F12E   | 99.23  | <i>Henriciella algicola</i> CCUG 67844        | <i>Pseudomonadota</i> | MW740134 |
| PMIC_1E8A    | 99.33  | <i>Limimaricola cinnabarinus</i> LL-001       | <i>Pseudomonadota</i> | MW740123 |
| PMIC_1E8C    | 99.33  | <i>Limimaricola cinnabarinus</i> LL-001       | <i>Pseudomonadota</i> | MW740124 |
| PMIC_1H8A    | 99.30  | <i>Limimaricola soesokkakensis</i> CECT 8367  | <i>Pseudomonadota</i> | MW740126 |
| PMIC_1C11B   | 100.00 | <i>Marinobacter litoralis</i> SW-45           | <i>Pseudomonadota</i> | MW740115 |
| PMIC_1E1A.3  | 100.00 | <i>Marinobacter litoralis</i> SW-45           | <i>Pseudomonadota</i> | MW740122 |
| PMIC_1A8A    | 100.00 | <i>Phaeobacter porticola</i> P97              | <i>Pseudomonadota</i> | MW740110 |

|             |        |                                                                 |                       |          |
|-------------|--------|-----------------------------------------------------------------|-----------------------|----------|
| PMIC_2H5C   | 99.92  | <i>Providencia vermicola</i> OP1                                | <i>Pseudomonadota</i> | MW740142 |
| PMIC_1D2B.2 | 100.00 | <i>Pseudoalteromonas atlantica</i> NBRC 103033                  | <i>Pseudomonadota</i> | MW740119 |
| PMIC_1B3B   | 100.00 | <i>Pseudoalteromonas carrageenovora</i> IAM 12662               | <i>Pseudomonadota</i> | MW740111 |
| PMIC_1C10   | 100.00 | <i>Pseudoalteromonas carrageenovora</i> IAM12662                | <i>Pseudomonadota</i> | MW740114 |
| PMIC_2C3A   | 100.00 | <i>Pseudoalteromonas carrageenovora</i> IAM12662                | <i>Pseudomonadota</i> | MW740127 |
| PMIC_2H5B   | 99.84  | <i>Pseudoalteromonas carrageenovora</i> IAM12662                | <i>Pseudomonadota</i> | MW740141 |
| PMIC_1F6B   | 100.00 | <i>Pseudoalteromonas neustonica</i> PAMC28425                   | <i>Pseudomonadota</i> | MW740125 |
| PMIC_2C8D   | 99.13  | <i>Pseudoalteromonas prydzensis</i> MB8-11                      | <i>Pseudomonadota</i> | MW740129 |
| PMIC_1B5B.1 | 100.00 | <i>Pseudoalteromonas tetraodonis</i> GFC                        | <i>Pseudomonadota</i> | MW740112 |
| PMIC_1B5B.2 | 100.00 | <i>Pseudoalteromonas tetraodonis</i> GFC                        | <i>Pseudomonadota</i> | MW740113 |
| PMIC_1C5B.2 | 99.35  | <i>Psychrobacter cryohalolentis</i> K5                          | <i>Pseudomonadota</i> | MW740116 |
| PMIC_2G8A.2 | 99.52  | <i>Psychrobacter cryohalolentis</i> K5                          | <i>Pseudomonadota</i> | MW740138 |
| PMIC_2G8B   | 99.53  | <i>Psychrobacter cryohalolentis</i> K5                          | <i>Pseudomonadota</i> | MW740139 |
| PMIC_1D8D.1 | 100.00 | <i>Psychrobacter nivimaris</i> 88/2-7                           | <i>Pseudomonadota</i> | MW740121 |
| PMIC_2D8E   | 100.00 | <i>Psychrobacter nivimaris</i> 88/2-7                           | <i>Pseudomonadota</i> | MW740131 |
| PMIC_2E9B.2 | 100.00 | <i>Psychrobacter nivimaris</i> 88/2-7                           | <i>Pseudomonadota</i> | MW740133 |
| PMIC_1D1B.1 | 100.00 | <i>Sulfitobacter pontiacus</i> DSM 10014                        | <i>Pseudomonadota</i> | MW740117 |
| PMIC_2D1A   | 100.00 | <i>Sulfitobacter pontiacus</i> DSM 10014                        | <i>Pseudomonadota</i> | MW740130 |
| PMIC_2E5B   | 100.00 | <i>Sulfitobacter pontiacus</i> DSM 10014                        | <i>Pseudomonadota</i> | MW740132 |
| PMIC_2G1A.1 | 100.00 | <i>Tritonibacter mobilis</i> subsp. <i>pelagius</i> NBRC 102038 | <i>Pseudomonadota</i> | MW740135 |
| PMIC_2G1A.2 | 100.00 | <i>Tritonibacter mobilis</i> subsp. <i>pelagius</i> NBRC 102038 | <i>Pseudomonadota</i> | MW740136 |
| PMIC_2G1B   | 100.00 | <i>Tritonibacter mobilis</i> subsp. <i>pelagius</i> NBRC 102038 | <i>Pseudomonadota</i> | MW740137 |
| PMIC_2C5A   | 99.93  | <i>Vibrio toranzoniae</i> Vb 10.8                               | <i>Pseudomonadota</i> | MW740128 |

---

**Table S2** - Total and per medium distribution of isolated strains by genera.

| Phylum                | Genus                     | Total Isolates | M600 Isolates | MA Isolates |
|-----------------------|---------------------------|----------------|---------------|-------------|
| <i>Actinomycetota</i> | <i>Arthrobacter</i>       | 4              | 3             | 1           |
|                       | <i>Corynebacterium</i>    | 1              | 1             | 0           |
|                       | <i>Dietzia</i>            | 2              | 2             | 0           |
|                       | <i>Kocuria</i>            | 1              | 1             | 0           |
|                       | <i>Microbacterium</i>     | 3              | 3             | 0           |
|                       | <i>Micromonospora</i>     | 1              | 1             | 0           |
|                       | <i>Nocardia</i>           | 1              | 1             | 0           |
|                       | <i>Nocardiosis</i>        | 29             | 6             | 23          |
|                       | <i>Rhodococcus</i>        | 5              | 2             | 3           |
|                       | <i>Streptomyces</i>       | 48             | 25            | 23          |
|                       | <i>Plantibacter</i>       | 1              | 0             | 1           |
| <i>Bacteroidota</i>   | <i>Aquimarina</i>         | 3              | 3             | 0           |
|                       | <i>Arenibacter</i>        | 2              | 1             | 1           |
|                       | <i>Catalinimonas</i>      | 1              | 1             | 0           |
|                       | <i>Tenacibaculum</i>      | 1              | 0             | 1           |
| <i>Bacillota</i>      | <i>Alkalihalobacillus</i> | 2              | 0             | 2           |
|                       | <i>Bacillus</i>           | 19             | 12            | 7           |
|                       | <i>Fictibacillus</i>      | 1              | 0             | 1           |
| <i>Pseudomonadota</i> | <i>Cobetia</i>            | 3              | 2             | 1           |
|                       | <i>Henriciella</i>        | 1              | 0             | 1           |
|                       | <i>Limimaricola</i>       | 3              | 3             | 0           |
|                       | <i>Marinobacter</i>       | 2              | 2             | 0           |
|                       | <i>Phaeobacter</i>        | 1              | 1             | 0           |
|                       | <i>Providencia</i>        | 1              | 0             | 1           |
|                       | <i>Pseudoalteromonas</i>  | 9              | 6             | 3           |
|                       | <i>Psychrobacter</i>      | 6              | 2             | 4           |
|                       | <i>Sulfitobacter</i>      | 3              | 1             | 2           |
|                       | <i>Tritonibacter</i>      | 3              | 0             | 3           |
|                       | <i>Vibrio</i>             | 1              | 0             | 1           |

**Table S3** - All compounds putatively identified and non-identified molecules present in the extracts.

| Strain ID  | Taxonomic unit                  | Medium          | Putatively Detected Molecules                                                                                                                                                                                                                   | Non-Identified Molecules                                                                        |
|------------|---------------------------------|-----------------|-------------------------------------------------------------------------------------------------------------------------------------------------------------------------------------------------------------------------------------------------|-------------------------------------------------------------------------------------------------|
| PMIC_1E12B | <i>Arthrobacter gandavensis</i> | M607            | cyclo(Pro-Tyr), cyclo(L-Leu-L-Pro), cyclo(Phe-Pro), 1H-indole-3-acetic acid, cyclo(Phe-Lxx), lauric diethanolamide                                                                                                                              | –                                                                                               |
|            |                                 | OSMAC 1:10 M607 | –                                                                                                                                                                                                                                               | –                                                                                               |
|            |                                 | OSMAC M607      | –                                                                                                                                                                                                                                               | –                                                                                               |
|            |                                 | OSMAC M600      | –                                                                                                                                                                                                                                               | –                                                                                               |
|            |                                 | OSMAC MA        | –                                                                                                                                                                                                                                               | –                                                                                               |
|            |                                 | OSMAC CGY       | –                                                                                                                                                                                                                                               | –                                                                                               |
| PMIC_1A10B | <i>Nocardia nova</i>            | M607            | lauric diethanolamide, N-acetyltyramine, cyclo(L-Leu-L-Pro), cyclo(Phe-Pro), 1H-indole-3-acetic acid                                                                                                                                            | –                                                                                               |
|            |                                 | OSMAC 1:10 M607 | taurocholic acid, linoleic acid, N-N-dimethyladenosine, N-acetyltyramine, cyclo(L-Leu-L-Pro), 1H-indole-3-acetic acid, cyclo(Phe-Pro), cyclo(Pro-Trp)                                                                                           | C <sub>9</sub> H <sub>10</sub> N <sub>2</sub> O; C <sub>15</sub> H <sub>24</sub> O <sub>3</sub> |
|            |                                 | OSMAC M607      | adenosine, cyclo(Pro-Tyr), cyclo(L-Leu-L-Pro), 1H-indole-3-acetic acid, cyclo(Phe-Pro), cyclo(Pro-Trp), taurocholic acid, lauric diethanolamide                                                                                                 | C <sub>27</sub> H <sub>54</sub> N <sub>10</sub> O <sub>10</sub>                                 |
|            |                                 | OSMAC M600      | adenosine, cyclo(Pro-Tyr), N-acetyltyramine, cyclo(L-Leu-L-Pro), cyclo(Pro-Trp), cyclo(Phe-Pro), cyclo(Phe-Val), cyclo(Phe-Lxx), taurocholic acid, lauramidopropyl betaine, lauric diethanolamide                                               | C <sub>22</sub> H <sub>44</sub> O <sub>12</sub>                                                 |
|            |                                 | OSMAC MA        | adenosine, cyclo(Pro-Tyr), N-acetyltyramine, cyclo(L-Leu-L-Pro), cyclo(Phe-Pro), N-[2-(1H-Indol-3-yl)-2-oxoethyl]acetamide, cyclo(Pro-Trp), cyclo(Phe-Val), N-(2-phenylethyl)acetamide, cyclo(Phe-Lxx), taurocholic acid, lauric diethanolamide | –                                                                                               |

|              |                          |                 |                                                                                                                                        |                                                                                                   |
|--------------|--------------------------|-----------------|----------------------------------------------------------------------------------------------------------------------------------------|---------------------------------------------------------------------------------------------------|
| PMIC_1A11B.2 | <i>Nocardiopsis alba</i> | OSMAC CGY       | N-N-dimethyladenosine, N-acetyltyramine, cyclo(L-Leu-L-Pro), 1H-indole-3-acetic acid, cyclo(Phe-Pro), taurocholic acid, cyclo(Phe-Lxx) | C <sub>22</sub> H <sub>44</sub> O <sub>12</sub> ; C <sub>24</sub> H <sub>48</sub> O <sub>13</sub> |
|              |                          | M607            | N-acetyltyramine, cyclo(Pro-Tyr), cyclo(L-Leu-L-Pro), 1H-indole-3-acetic acid, cyclo(Phe-Lxx), germicidin A, lauric diethanolamide     | C <sub>12</sub> H <sub>25</sub> NO <sub>3</sub> , C <sub>14</sub> H <sub>29</sub> NO <sub>3</sub> |
|              |                          | OSMAC 1:10 M607 | -                                                                                                                                      | -                                                                                                 |
|              |                          | OSMAC M607      | -                                                                                                                                      | -                                                                                                 |
|              |                          | OSMAC M600      | -                                                                                                                                      | -                                                                                                 |
|              |                          | OSMAC MA        | -                                                                                                                                      | -                                                                                                 |
|              |                          | OSMAC CGY       | -                                                                                                                                      | -                                                                                                 |
|              |                          | M607            | cyclo(Pro-Trp), N-acetyltyramine, cyclo(L-Leu-L-Pro), 1H-indole-3-acetic acid, lumichrome, lauric diethanolamide, germicidin A         | -                                                                                                 |
|              |                          | OSMAC 1:10 M607 | -                                                                                                                                      | -                                                                                                 |
|              |                          | OSMAC M607      | -                                                                                                                                      | -                                                                                                 |
| PMIC_2A11B.1 | <i>Nocardiopsis alba</i> | OSMAC M600      | N-acetyltyramine, cyclo(L-Leu-L-Pro), 1H-indole-3-acetic acid, cyclo(Pro-Trp), germicidin A, taurocholic acid                          | -                                                                                                 |
|              |                          | OSMAC MA        | -                                                                                                                                      | -                                                                                                 |
|              |                          | OSMAC CGY       | N-acetyltyramine, cyclo(L-Leu-L-Pro), cyclo(Phe-Pro), cyclo(Pro-Trp), taurocholic acid, germicidin A, antibiotic X 14952B              | -                                                                                                 |
|              |                          | M607            | cyclo(Pro-Tyr), MDN-0100, cyclo(L-Leu-L-Pro), 1H-indole-3-acetic acid, cyclo(Phe-Pro), lauric diethanolamide                           | C <sub>20</sub> H <sub>31</sub> NO <sub>4</sub> S                                                 |
|              |                          | OSMAC 1:10 M607 | -                                                                                                                                      | -                                                                                                 |
| PMIC_1F6A.3  | <i>Nocardiopsis alba</i> | OSMAC M607      | -                                                                                                                                      | -                                                                                                 |
|              |                          | OSMAC M607      | -                                                                                                                                      | -                                                                                                 |

|             |                                |            |                                                                                                                                                                         |                                                                                                 |
|-------------|--------------------------------|------------|-------------------------------------------------------------------------------------------------------------------------------------------------------------------------|-------------------------------------------------------------------------------------------------|
| PMIC_2H2C.2 | <i>Nocardiopsis alba</i>       | OSMAC      | -                                                                                                                                                                       | -                                                                                               |
|             |                                | M600       | -                                                                                                                                                                       | -                                                                                               |
|             |                                | OSMAC MA   | -                                                                                                                                                                       | -                                                                                               |
|             |                                | OSMAC      | -                                                                                                                                                                       | -                                                                                               |
|             |                                | CGY        | -                                                                                                                                                                       | -                                                                                               |
|             |                                | M607       | cyclo(L-Leu-L-Pro), 1H-indole-3-acetic acid, cyclo(Phe-Pro), lauric diethanolamide                                                                                      | -                                                                                               |
|             |                                | OSMAC 1:10 | cyclo(L-Leu-L-Pro), taurocholic acid                                                                                                                                    | C <sub>27</sub> H <sub>52</sub> N <sub>10</sub> O <sub>10</sub>                                 |
|             |                                | M607       |                                                                                                                                                                         |                                                                                                 |
|             |                                | OSMAC      | -                                                                                                                                                                       | -                                                                                               |
|             |                                | M607       |                                                                                                                                                                         |                                                                                                 |
| PMIC_1E10C  | <i>Rhodococcus coprophilus</i> | OSMAC      | N-acetyltyramine, cyclo(L-Leu-L-Pro), cyclo(Phe-Pro), 1H-indole-3-acetic acid, cyclo(Pro-Trp), taurocholic acid, antibiotic X 14952B                                    | C <sub>15</sub> H <sub>24</sub> O <sub>4</sub>                                                  |
|             |                                | M600       |                                                                                                                                                                         |                                                                                                 |
|             |                                | OSMAC MA   | -                                                                                                                                                                       | -                                                                                               |
|             |                                | OSMAC      | cyclo(Pro-Tyr), N-acetyltyramine, cyclo(L-Leu-L-Pro), cyclo(Phe-Pro), cyclo(Pro-Trp), N-(2-phenylethyl)acetamide, cyclo(Phe-Lxx), taurocholic acid, antibiotic X 14952B | C <sub>15</sub> H <sub>24</sub> O <sub>4</sub> , C <sub>16</sub> H <sub>24</sub> O <sub>3</sub> |
|             |                                | CGY        |                                                                                                                                                                         |                                                                                                 |
|             |                                | M607       | cyclo(L-Leu-L-Pro), 1H-indole-3-acetic acid, cyclo(Phe-Pro), cyclo(Pro-Trp), lauric diethanolamide                                                                      | C <sub>14</sub> H <sub>29</sub> NO <sub>3</sub>                                                 |
|             |                                | OSMAC 1:10 | -                                                                                                                                                                       | -                                                                                               |
|             |                                | M607       |                                                                                                                                                                         |                                                                                                 |
|             |                                | OSMAC      | -                                                                                                                                                                       | -                                                                                               |
|             |                                | M607       |                                                                                                                                                                         |                                                                                                 |
|             |                                | OSMAC      | -                                                                                                                                                                       | -                                                                                               |
|             |                                | M600       | -                                                                                                                                                                       | -                                                                                               |
|             |                                | OSMAC MA   | -                                                                                                                                                                       | -                                                                                               |
|             |                                | OSMAC      | -                                                                                                                                                                       | -                                                                                               |
|             |                                | CGY        | -                                                                                                                                                                       | -                                                                                               |



|           |                                  |                 |                                                                                                                                                                           |                                                                                                                                 |
|-----------|----------------------------------|-----------------|---------------------------------------------------------------------------------------------------------------------------------------------------------------------------|---------------------------------------------------------------------------------------------------------------------------------|
| PMIC_2C12 | <i>Streptomyces albidoflavus</i> | M607            | cyclo(Pro-Tyr), N-acetyltyramine, cyclo(L-Leu-L-Pro), 1H-indole-3-acetic acid, cyclo(Phe-Pro), germicidin G, lauric diethanolamide, MDN-0142 - surugamide A, ansalactam A | –                                                                                                                               |
|           |                                  | OSMAC 1:10 M607 | –                                                                                                                                                                         | –                                                                                                                               |
|           |                                  | OSMAC M607      | –                                                                                                                                                                         | –                                                                                                                               |
|           |                                  | OSMAC M600      | –                                                                                                                                                                         | –                                                                                                                               |
|           |                                  | OSMAC MA        | –                                                                                                                                                                         | –                                                                                                                               |
|           |                                  | OSMAC CGY       | –                                                                                                                                                                         | –                                                                                                                               |
| PMIC_1A8B | <i>Streptomyces flavoviridis</i> | M607            | N-acetyltyramine, cyclo(L-Leu-L-Pro), 1H-indole-3-acetic acid, cyclo(Phe-Pro), cyclo(Pro-Trp), N-(2-phenylethyl)acetamide, cyclo(Phe-Lxx), lauric diethanolamide          | C <sub>20</sub> H <sub>13</sub> N <sub>3</sub> O <sub>6</sub> , C <sub>23</sub> H <sub>13</sub> ClO <sub>4</sub> S <sub>2</sub> |
|           |                                  | OSMAC 1:10 M607 | cyclo(L-Leu-L-Pro), taurocholic acid                                                                                                                                      | C <sub>23</sub> H <sub>13</sub> ClO <sub>4</sub> S <sub>2</sub>                                                                 |
|           |                                  | OSMAC M607      | cyclo(Pro-Tyr), N-acetyltyramine, cyclo(L-Leu-L-Pro), cyclo(Phe-Pro), taurocholic acid, lauric diethanolamide                                                             | –                                                                                                                               |
|           |                                  | OSMAC M600      | N-acetyltyramine, cyclo(L-Leu-L-Pro), cyclo(Phe-Pro), cyclo(Pro-Trp), cyclo(Phe-Val), cyclo(Phe-Lxx), taurocholic acid                                                    | C <sub>20</sub> H <sub>13</sub> N <sub>3</sub> O <sub>6</sub> , C <sub>23</sub> H <sub>13</sub> ClO <sub>4</sub> S <sub>2</sub> |
|           |                                  | OSMAC MA        | –                                                                                                                                                                         | –                                                                                                                               |
|           |                                  | OSMAC CGY       | –                                                                                                                                                                         | –                                                                                                                               |
| PMIC_1D9B | <i>Streptomyces griseoflavus</i> | M607            | N-acetyltyramine, cyclo(L-Leu-L-Pro), 1H-indole-3-acetic acid, cyclo(Pro-Trp), N-(2-phenylethyl)acetamide, lauric diethanolamide, ansalactam A                            | –                                                                                                                               |
|           |                                  | OSMAC 1:10 M607 | N-acetyltyramine, taurocholic acid, lauramidopropyl betaine, lauric diethanolamide, ansalactam A                                                                          | –                                                                                                                               |

|            |                                 |                 |                                                                                                                                                                                                                                                                                                                                                       |                                                |
|------------|---------------------------------|-----------------|-------------------------------------------------------------------------------------------------------------------------------------------------------------------------------------------------------------------------------------------------------------------------------------------------------------------------------------------------------|------------------------------------------------|
| PMIC_1I1A  | <i>Streptomyces hydrogenans</i> | OSMAC M607      | cyclo(Pro-Tyr), N-acetyltyramine, cyclo(L-Leu-L-Pro), 1H-indole-3-acetic acid, cyclo(Phe-Pro), 3-acetylamino-N-2-thienylpropanamide, taurocholic acid, lauric diethanolamide, ansalactam A                                                                                                                                                            | –                                              |
|            |                                 | OSMAC M600      | cyclo(Pro-Tyr), N-acetyltyramine, cyclo(L-Leu-L-Pro), 1H-indole-3-acetic acid, cyclo(Pro-Trp), 3-acetylamino-N-2-thienylpropanamide, taurocholic acid, lauramidopropyl betaine, lauric diethanolamide, ansalactam A                                                                                                                                   | –                                              |
|            |                                 | OSMAC MA        | –                                                                                                                                                                                                                                                                                                                                                     | –                                              |
|            |                                 | OSMAC CGY       | N-acetyltyramine, cyclo(Phe-Pro), 3-acetylamino-N-2-thienylpropanamide, cyclo(Phe-Val), cyclo(Phe-Lxx), taurocholic acid, ansalactam A                                                                                                                                                                                                                | –                                              |
|            |                                 | M607            | N-N-dimethyladenosine, cyclo(Pro-Tyr), N-acetyltyramine, cyclo(L-Leu-L-Pro), 1H-indole-3-acetic acid, cyclo(Phe-Pro), cyclo(Pro-Trp), antibiotic MKN 003B, germicidin G, lauric diethanolamide, surugamide A                                                                                                                                          | C <sub>13</sub> H <sub>22</sub> O <sub>3</sub> |
|            |                                 | OSMAC 1:10 M607 | N-N-dimethyladenosine, cyclo(L-Leu-L-Pro), taurocholic acid, antibiotic MKN 003B, germicidin G, surugamide E, surugamide A                                                                                                                                                                                                                            | C <sub>13</sub> H <sub>22</sub> O <sub>3</sub> |
|            |                                 | OSMAC M607      | –                                                                                                                                                                                                                                                                                                                                                     | –                                              |
|            |                                 | OSMAC M600      | –                                                                                                                                                                                                                                                                                                                                                     | –                                              |
|            |                                 | OSMAC MA        | –                                                                                                                                                                                                                                                                                                                                                     | –                                              |
|            |                                 | OSMAC CGY       | N-N-dimethyladenosine, cyclo(Pro-Tyr), N-acetyltyramine, cyclo(L-Leu-L-Pro), cyclo(Phe-Pro), N-[2-(1H-Indol-3-yl)-2-oxoethyl]acetamide, cyclo(Pro-Trp), cyclo(Lxx-Lxx), cyclo(Phe-Lxx), taurocholic acid, antibiotic MKN 003B, germicidin G, lauramidopropyl betaine, surugamide E, surugamide A, blastmycin, antimycin A13, antimycin A11- SPA 8893A | C <sub>13</sub> H <sub>22</sub> O <sub>3</sub> |
| PMIC_1F12B | <i>Streptomyces setonii</i>     | M607            | corynecin I, N-acetyltyramine, cyclo(Phe-Pro), 1H-indole-3-acetic acid, chloramphenicol, lauric diethanolamide                                                                                                                                                                                                                                        | –                                              |

|                    |                                                                                                                                                                                   |                                                                |
|--------------------|-----------------------------------------------------------------------------------------------------------------------------------------------------------------------------------|----------------------------------------------------------------|
| OSMAC 1:10<br>M607 | N-acetyltyramine, cyclo(L-Leu-L-Pro), taurocholic acid, 3-(Hydroxymethyl)-2-(1-hydroxy-6-methylheptyl)butanolide                                                                  | C <sub>27</sub> H <sub>53</sub> N <sub>5</sub> O <sub>10</sub> |
| OSMAC<br>M607      | –                                                                                                                                                                                 | –                                                              |
| OSMAC<br>M600      | N-N-dimethyladenosine, cyclo(L-Leu-L-Pro), cyclo(Phe-Pro), N-acetyltyramine, 1H-indole-3-acetic acid, taurocholic acid                                                            | –                                                              |
| OSMAC MA           | –                                                                                                                                                                                 | –                                                              |
| OSMAC<br>CGY       | N-N-dimethyladenosine, N-acetyltyramine, cyclo(L-Leu-L-Pro), 1H-indole-3-acetic acid, N-[2-(1H-Indol-3-yl)-2-oxoethyl]acetamide, cyclo(Phe-Pro), cyclo(Phe-Lxx), taurocholic acid | C <sub>22</sub> H <sub>44</sub> O <sub>12</sub>                |

Supplementary Figures

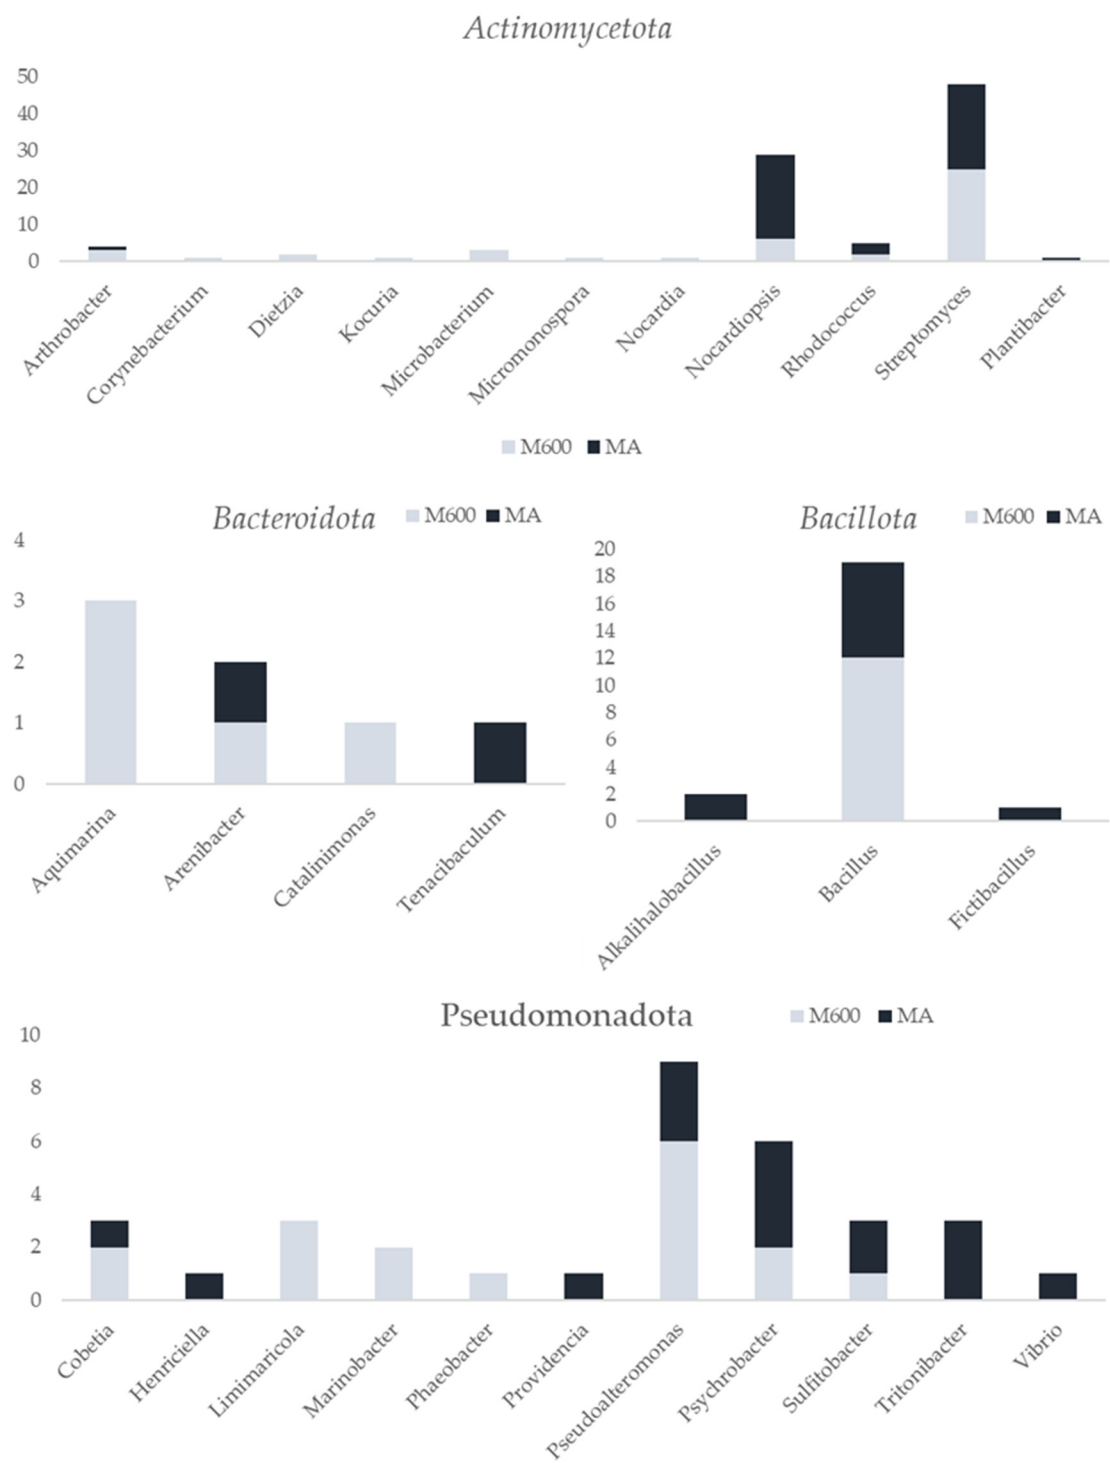

Figure S1 - Distribution of the genera of the obtained strains per medium used.

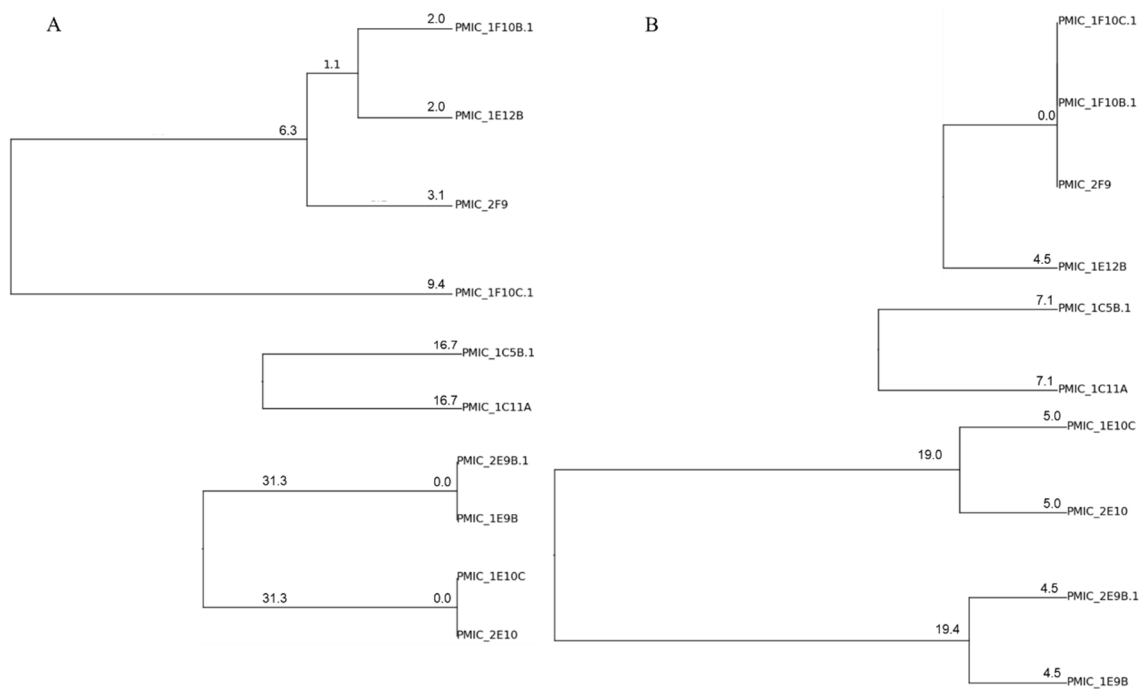

**Figure S2** – (A) ERIC-PCR fingerprinting performed on strains belonging to *Arthrobacter gandavensis*, *Dietzia maris*, *Rhodococcus coprophilus* and *Rhodococcus erythropolis*. (B) BOX-PCR fingerprinting performed on strains belonging to *A. gandavensis*, *D. maris*, *R. coprophilus* and *R. erythropolis*.

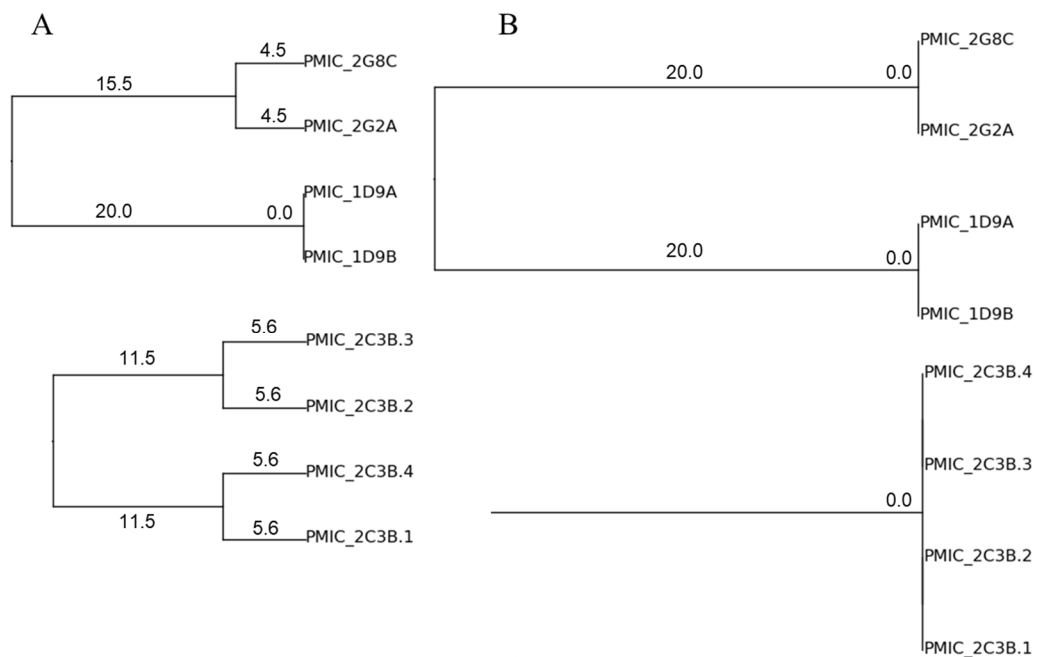

**Figure S3** - (A) ERIC-PCR fingerprinting performed on strains belonging to *Streptomyces griseoflavus*, *Streptomyces ambofaciens* and *Nocardioopsis umidischolae*. (B) BOX-PCR fingerprinting performed on strains belonging to *S. griseoflavus*, *S. ambofaciens* and *N. umidischolae*.

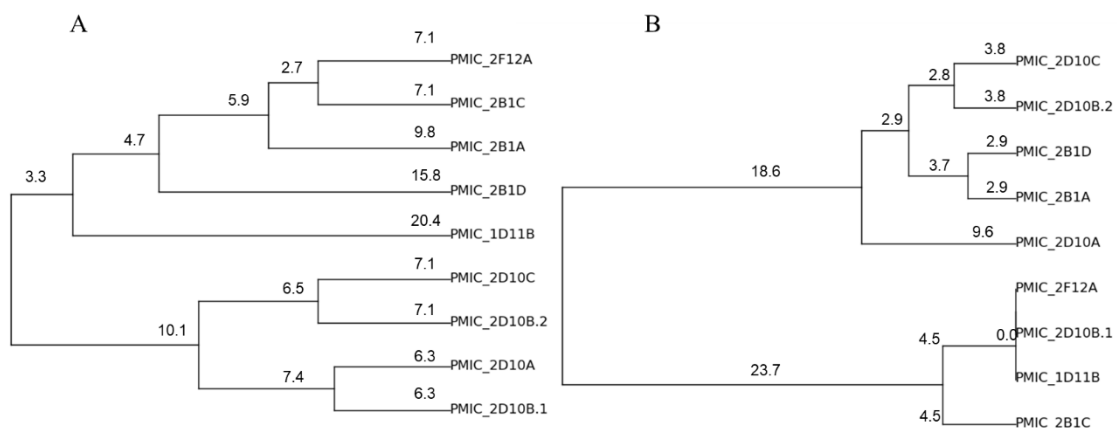

**Figure S4** - (A) ERIC -PCR fingerprinting performed on strains belonging to *Nocardiosis prasina*. (B) BOX-PCR fingerprinting performed on strains belonging to *N. prasina*.

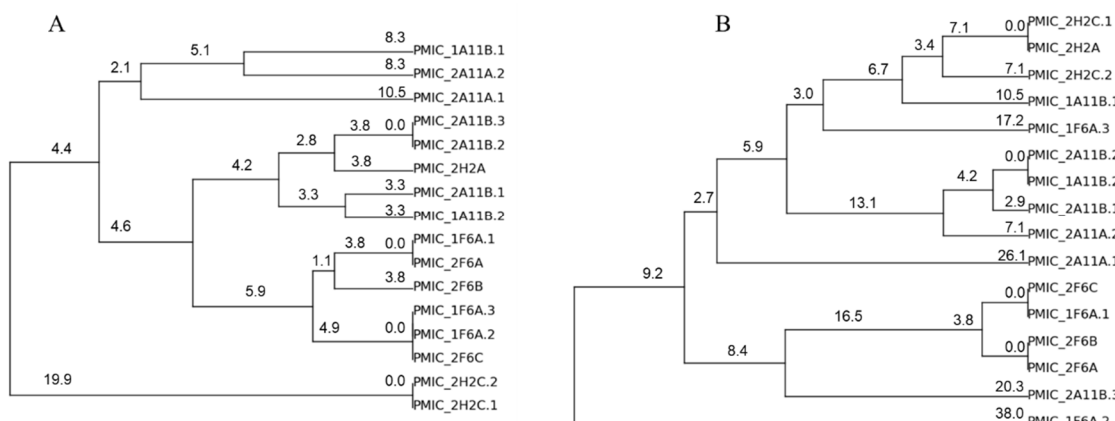

**Figure S5** - (A) ERIC-PCR fingerprinting performed on strains belonging to *Nocardiosis alba*. (B) BOX-PCR fingerprinting performed on strains belonging to *N. alba*.

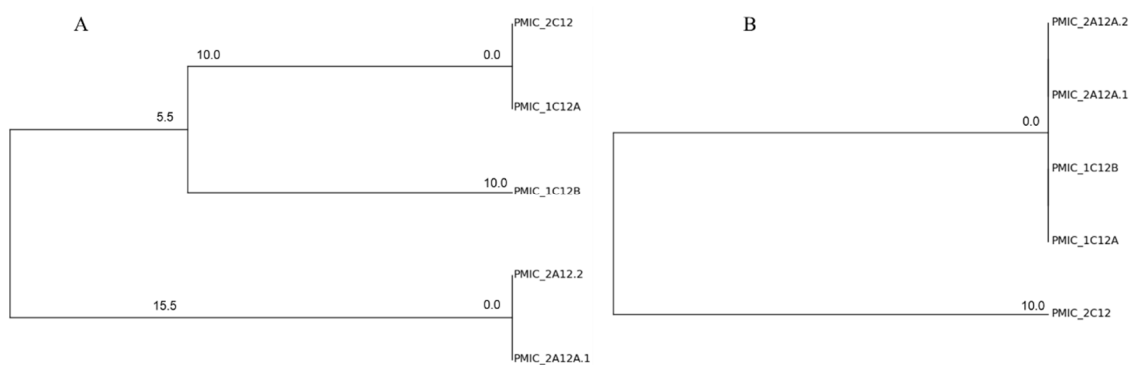

**Figure S6** - (A) ERIC-PCR fingerprinting performed on strains belonging to *Streptomyces albidoflavus*. (B) BOX-PCR fingerprinting performed on strains belonging to *S. albidoflavus*.

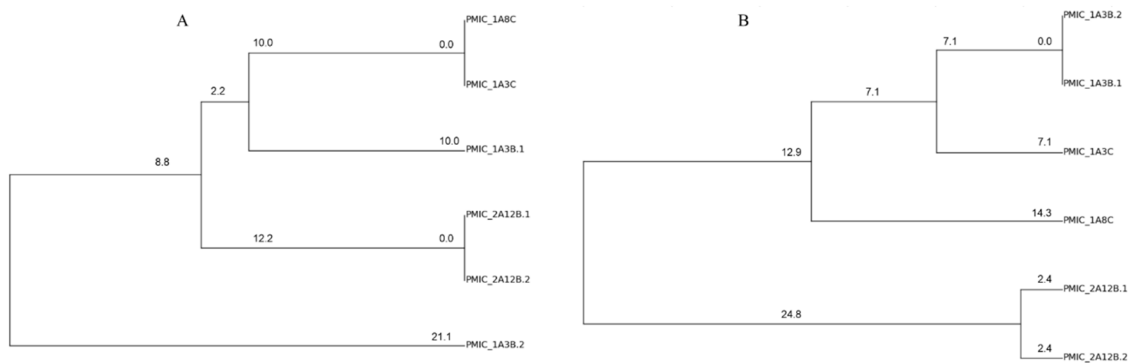

**Figure S7** - (A) ERIC-PCR fingerprinting performed on strains belonging to *Streptomyces albogriseolus*. (B) BOX-PCR fingerprinting performed on strains belonging to *S. albogriseolus*.

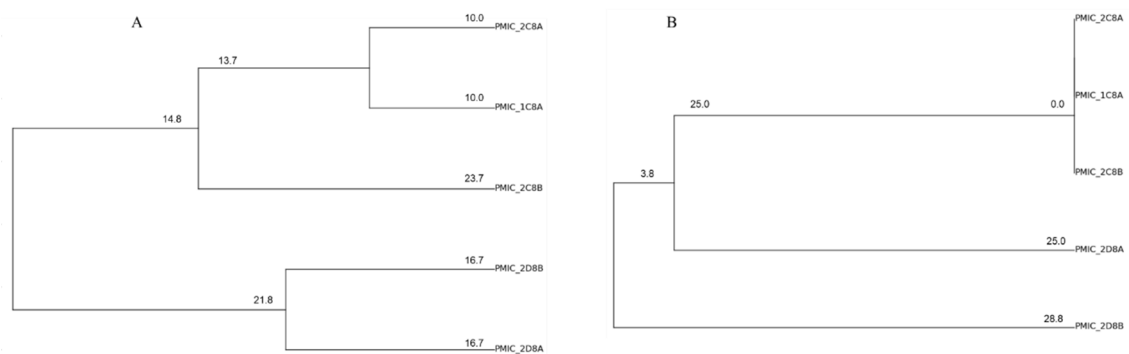

**Figure S8** - (A) ERIC-PCR fingerprinting performed on strains belonging to *Streptomyces ardesiacus*. (B) BOX-PCR fingerprinting performed on strains belonging to *S. ardesiacus*.

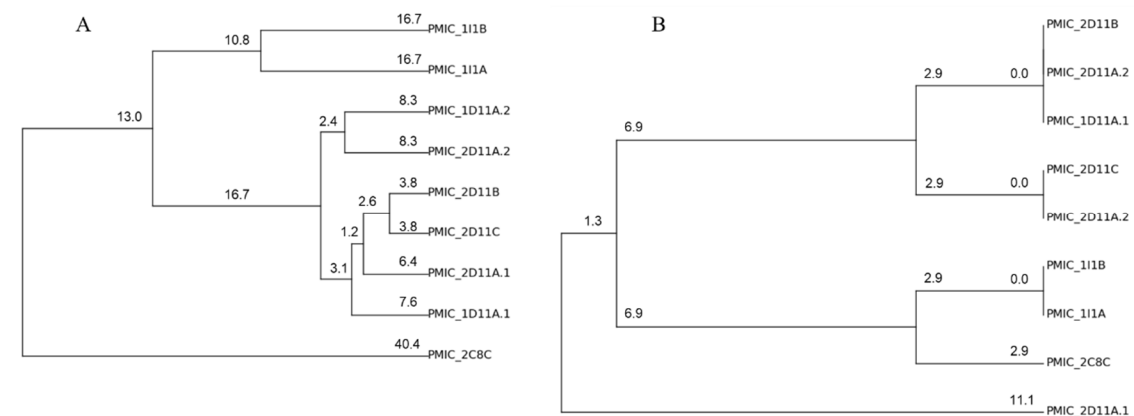

**Figure S9** - (A) ERIC-PCR fingerprinting performed on strains belonging to *Streptomyces hydrogenans*. (B) BOX-PCR fingerprinting performed on strains belonging to *S. hydrogenans*.

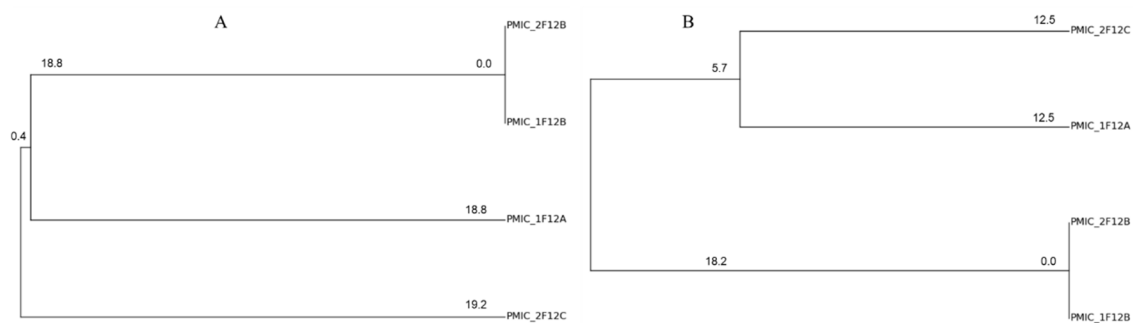

**Figure S10** - (A) ERIC-PCR fingerprinting performed on strains belonging to *Streptomyces setonii*. (B) BOX-PCR fingerprinting performed on strains belonging to *S. setonii*.

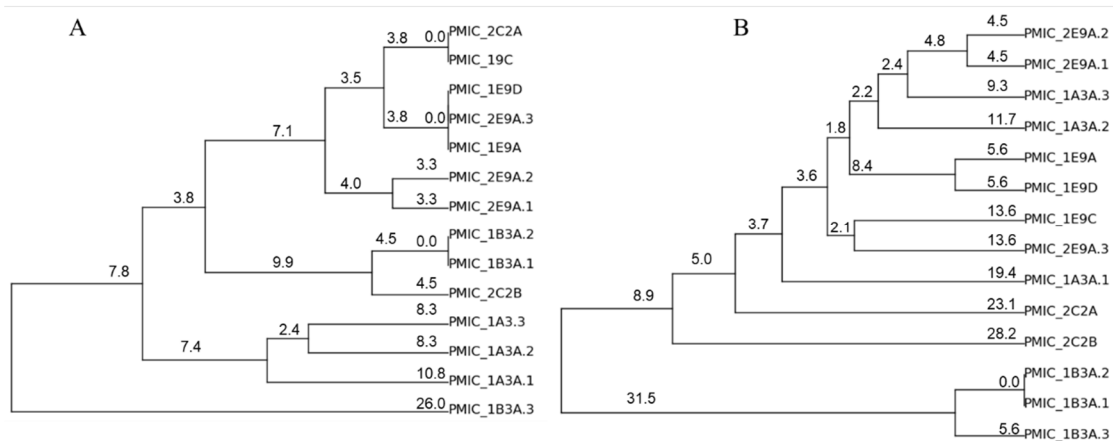

**Figure S11** - (A) ERIC-PCR fingerprinting performed on strains belonging to *Streptomyces xiamenensis*. (B) BOX-PCR fingerprinting performed on strains belonging to *S. xiamenensis*.
